# Supplementary material
Source: PubMed Central journal article supplement (PMC6821576)

**Supplementary figure 1: Movement between Proportion of Days Covered (PDC) categories, pre- to post-model implementation, Patient-centered HIV Care Model, 2014 – 2016, United States**

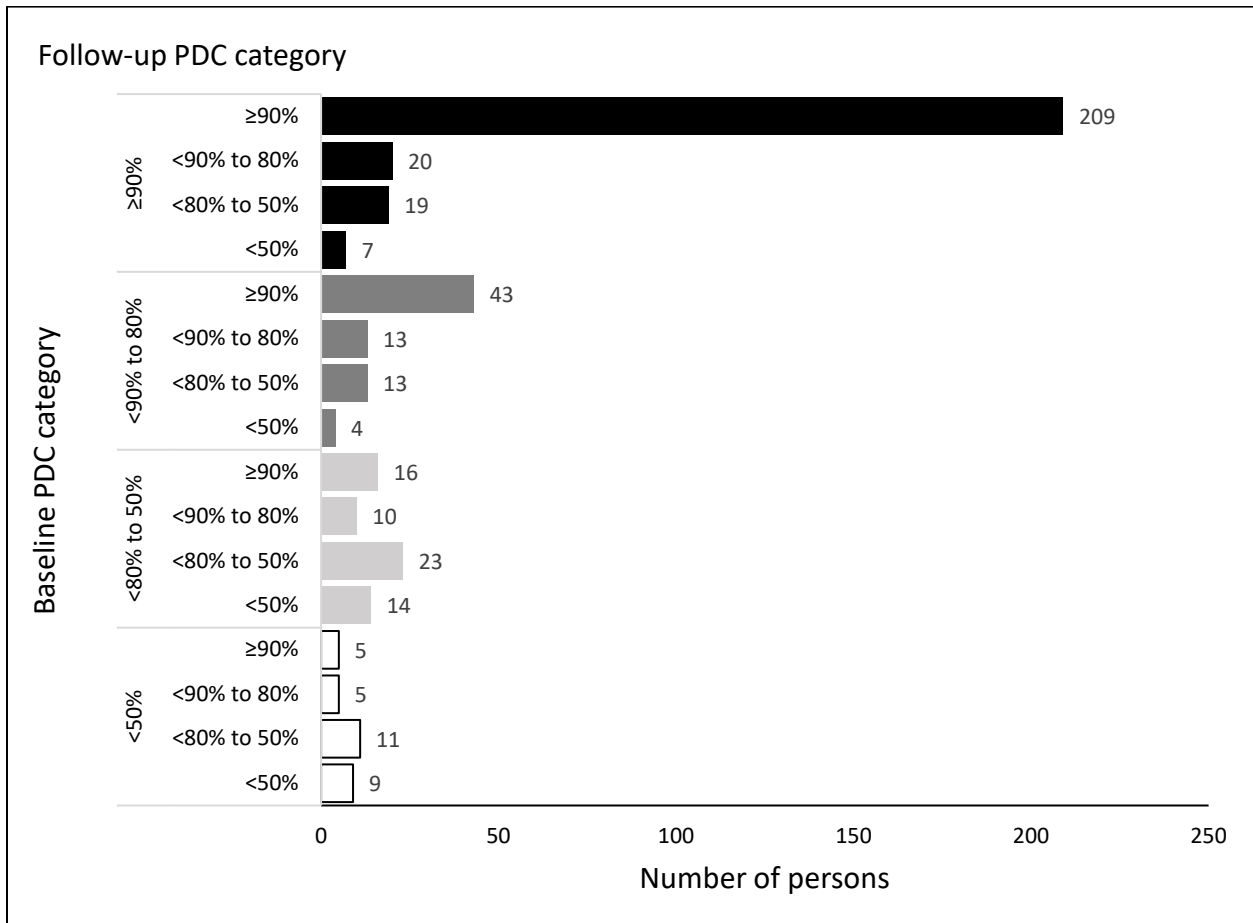

Supplement: NIHMS1055708-supplement-Supplementary_Figure.pdf [file NIHMS1055708-supplement-Supplementary_Figure.pdf]
